# Supplementary material for: Synthesis and magnetic studies of pentagonal bipyramidal metal complexes of Fe, Co and Ni
Source: Royal Society of Chemistry journal article supplement (doi:10.1039/c8dt05074k), 2019-01-01
Supplement: c8dt05074k1.pdf [file c8dt05074k1.pdf]

## Supporting Information

### Synthesis and Magnetic Studies of Pentagonal Bipyramidal Metal Complexes of Fe, Co and Ni

Yi-Fei Deng,<sup>a</sup> Binling Yao,<sup>a</sup> Peng-Zhi Zhan,<sup>a</sup> Dexuan Gan,<sup>a</sup> Yuan-Zhu Zhang<sup>\*a</sup> and Kim R. Dunbar<sup>\*b</sup>

<sup>a</sup>Department of Chemistry, Southern University of Science and Technology, Shenzhen, 518000, China.

<sup>b</sup>Department of Chemistry, Texas A & M University, College Station, TX 77842, USA.

**Table S1.** Selected bond lengths (Å) and angles (deg) for complexes **1-3**.

| 1                          |            | 2                          |           | 3                          |            |
|----------------------------|------------|----------------------------|-----------|----------------------------|------------|
| Fe(1)-N(1)                 | 2.121(3)   | Co(1)-N(1)                 | 2.123(2)  | Ni(1)-N(1)                 | 1.982(4)   |
| Fe(1)-N(2)                 | 2.176(3)   | Co(1)-N(2)                 | 2.171(2)  | Ni(1)-N(2)                 | 2.109(3)   |
| Fe(1)-N(3) <sub>MeCN</sub> | 2.165(3)   | Co(1)-N(3) <sub>MeCN</sub> | 2.120(2)  | Ni(1)-N(3) <sub>MeCN</sub> | 2.048(3)   |
| Fe(1)-O(1)                 | 2.300(2)   | Co(1)-O(1)                 | 2.273(2)  | Ni(1)-O(1)                 | 2.477(3)   |
| N(1)-Fe(1)-N(2)            | 73.03(7)   | N(3)-Co(1)-N(3)#1          | 173.21(8) | N(1)-Ni(1)-N(3)#1          | 95.37(7)   |
| N(1)-Fe(1)-N(3)            | 93.88(7)   | N(3)-Co(1)-N(1)            | 93.40(4)  | N(1)-Ni(1)-N(3)            | 95.37(7)   |
| N(3)-Fe(1)-N(2)            | 90.93(10)  | N(3)#1-Co(1)-N(1)          | 93.40(4)  | N(3)#1-Ni(1)-N(3)          | 169.26(15) |
| N(1)-Fe(1)-N(3)#1          | 93.87(7)   | N(3)-Co(1)-N(2)            | 90.68(6)  | N(1)-Ni(1)-N(2)            | 77.06(8)   |
| N(3)#1-Fe(1)-N(3)          | 172.25(14) | N(3)#1-Co(1)-N(2)          | 91.34(6)  | N(3)#1-Ni(1)-N(2)          | 91.77(11)  |
| N(3)#1-Fe(1)-N(2)          | 91.34(10)  | N(1)-Co(1)-N(2)            | 72.70(4)  | N(3)-Ni(1)-N(2)            | 90.63(11)  |
| N(1)-Fe(1)-N(2)#1          | 73.03(7)   | N(1)-Co(1)-N(2)#1          | 72.70(4)  | N(1)-Ni(1)-N(2)#1          | 77.06(8)   |
| N(2)-Fe(1)-N(2)#1          | 146.05(15) | N(2)-Co(1)-N(2)#1          | 145.40(9) | N(2)-Ni(1)-N(2)#1          | 154.11(16) |
| N(1)-Fe(1)-O(1)            | 144.92(5)  | N(3)-Co(1)-O(1)#1          | 89.88(6)  | N(1)-Ni(1)-O(1)            | 147.81(5)  |
| N(3)#1-Fe(1)-O(1)          | 89.80(9)   | N(3)-Co(1)-O(1)            | 84.54(6)  | N(3)#1-Ni(1)-O(1)          | 89.22(9)   |
| N(3)-Fe(1)-O(1)            | 83.85(9)   | N(1)-Co(1)-O(1)#1          | 145.07(3) | N(3)-Ni(1)-O(1)            | 81.67(9)   |
| N(2)-Fe(1)-O(1)            | 72.02(9)   | N(2)-Co(1)-O(1)#1          | 142.08(6) | N(2)-Ni(1)-O(1)            | 70.96(10)  |
| N(2)#1-Fe(1)-O(1)          | 141.86(9)  | N(3)#1-Co(1)-O(1)          | 89.89(6)  | N(2)#1-Ni(1)-O(1)          | 134.86(9)  |
| N(1)-Fe(1)-O(1)#1          | 144.92(5)  | N(1)-Co(1)-O(1)            | 145.07(3) | N(3)-Ni(1)-O(1)#1          | 89.22(9)   |
| N(3)-Fe(1)-O(1)#1          | 89.80(9)   | N(2)-Co(1)-O(1)            | 72.46(6)  | N(1)-Ni(1)-O(1)#1          | 147.82(7)  |
| N(2)-Fe(1)-O(1)#1          | 141.86(9)  | N(2)#1-Co(1)-O(1)          | 142.08(6) | N(2)-Ni(1)-O(1)#1          | 134.86(9)  |
| O(1)-Fe(1)-O(1)#1          | 70.16(10)  | O(1)#1-Co(1)-O(1)          | 69.86(7)  | O(1)-Ni(1)-O(1)#1          | 64.37(8)   |

Symmetry transformations used to generate equivalent atoms: #1 -x+1, y, -z+1/2.

**Table S2.** Parameters fitted for **1** at 1500 Oe and **2** at 1200 Oe by a generalized Debye model.

| <b>1</b>     |                          |          | <b>2</b>     |                          |          |
|--------------|--------------------------|----------|--------------|--------------------------|----------|
| <i>T</i> / K | $\tau$ / s               | $\alpha$ | <i>T</i> / K | $\tau$ / s               | $\alpha$ |
| 2.00         | $1.71(6) \times 10^{-3}$ | 0.27(2)  | 2.00         | $9.85(2) \times 10^{-2}$ | 0.27(2)  |
| 2.25         | $1.42(3) \times 10^{-3}$ | 0.21(1)  | 2.50         | $2.47(4) \times 10^{-2}$ | 0.15(2)  |
| 2.50         | $1.18(2) \times 10^{-3}$ | 0.17(1)  | 3.00         | $7.81(2) \times 10^{-3}$ | 0.087(5) |
| 2.75         | $9.50(7) \times 10^{-4}$ | 0.14(1)  | 3.50         | $2.88(3) \times 10^{-2}$ | 0.063(5) |
| 3.00         | $7.46(6) \times 10^{-4}$ | 0.13(1)  | 4.00         | $1.25(1) \times 10^{-2}$ | 0.049(3) |
| 3.25         | $5.72(4) \times 10^{-4}$ | 0.096(4) | 4.25         | $8.65(4) \times 10^{-4}$ | 0.044(2) |
| 3.50         | $4.02(2) \times 10^{-4}$ | 0.069(3) | 4.50         | $6.12(3) \times 10^{-4}$ | 0.043(3) |
| 3.65         | $3.05(2) \times 10^{-4}$ | 0.057(3) | 4.75         | $4.48(2) \times 10^{-4}$ | 0.033(3) |
| 3.80         | $2.22(1) \times 10^{-4}$ | 0.042(3) | 5.00         | $3.32(2) \times 10^{-4}$ | 0.029(2) |
| 3.95         | $1.49(2) \times 10^{-4}$ | 0.041(4) | 5.25         | $2.50(3) \times 10^{-4}$ | 0.024(3) |
| 4.10         | $9.41(2) \times 10^{-5}$ | 0.052(5) | 5.50         | $1.90(1) \times 10^{-4}$ | 0.023(2) |
| 4.25         | $5.95(3) \times 10^{-5}$ | 0.054(6) | 5.75         | $1.45(2) \times 10^{-4}$ | 0.019(2) |
| 4.50         | $2.89(3) \times 10^{-5}$ | 0.067(4) | 6.00         | $1.11(2) \times 10^{-4}$ | 0.016(3) |
|              |                          |          | 6.25         | $8.38(4) \times 10^{-5}$ | 0.019(3) |

**Table S3.** The SH parameters extracted from fitting and *ab initio* calculations for complexes **1–3**.

|          | <i>D</i> / cm <sup>-1</sup> | <i>E/D</i> | <i>g<sub>x</sub></i> | <i>g<sub>y</sub></i> | <i>g<sub>z</sub></i> |
|----------|-----------------------------|------------|----------------------|----------------------|----------------------|
| <b>1</b> | -19.7                       | 0.02       | 2.13                 | 2.17                 | 2.65                 |
| <b>2</b> | +37.8                       | <0.01      | 2.30                 | 2.28                 | 2.04                 |
| <b>3</b> | -15.4                       | 0.21       | 1.74                 | 1.91                 | 2.59                 |

**Table S4.** The relative energies of ground and low-lying quartet spin eigenstates (cm<sup>-1</sup>).

|                             | <b>1</b> | <b>2</b> | <b>3</b> |
|-----------------------------|----------|----------|----------|
| <sup>4</sup> Ψ <sub>0</sub> | 0.0      | 0.0      | 0.0      |
| <sup>4</sup> Ψ <sub>1</sub> | 5239.1   | 3078.2   | 6240.6   |
| <sup>4</sup> Ψ <sub>2</sub> | 7612.3   | 3122.0   | 7394.0   |
| <sup>4</sup> Ψ <sub>3</sub> | 9012.4   | 5282.6   | 8466.9   |
| <sup>4</sup> Ψ <sub>4</sub> | 10367.1  | 5813.2   | 12385.7  |
| <sup>4</sup> Ψ <sub>5</sub> | 11478.3  | 10392.2  | 12710.1  |
| <sup>4</sup> Ψ <sub>6</sub> | 11961.4  | 13131.0  | 13109.3  |
| <sup>4</sup> Ψ <sub>7</sub> | 24127.6  | 17262.0  | 28002.8  |
| <sup>4</sup> Ψ <sub>8</sub> | 25364.1  | 18418.1  | 28268.5  |
| <sup>4</sup> Ψ <sub>9</sub> | 27498.3  | 19842.2  | 29112.9  |

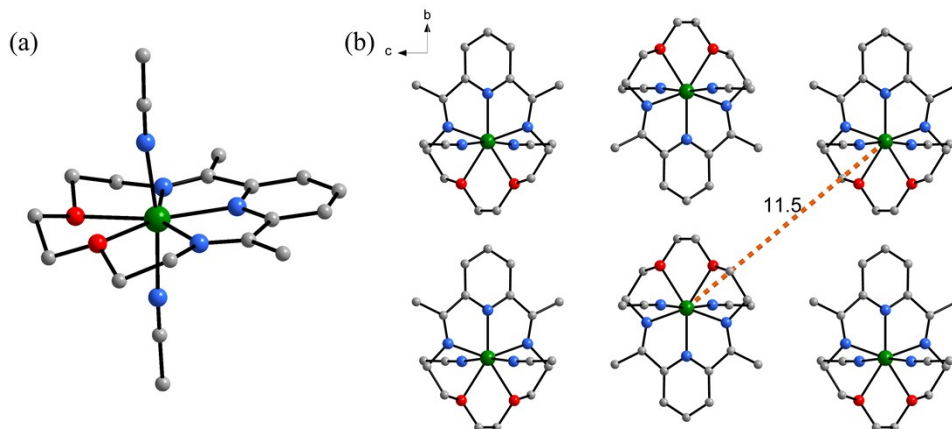

**Figure S1.** Molecular structure (a) and packing arrangement (b) of **1** along the crystallographic *a* axis; The dashed line shows the nearest intermolecular Fe...Fe separation (Å). Hydrogen atoms and counterions are omitted for clarity. Colour codes: Fe, green; C, grey; O, red; N, blue.

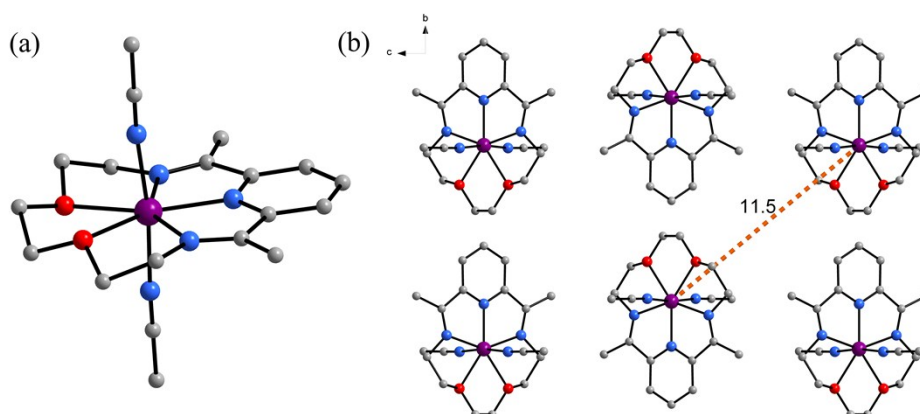

**Figure S2.** Molecular structure (a) and packing arrangement (b) of **2** along the crystallographic *a* axis; The dashed line shows the nearest intermolecular Co...Co separation (Å). Hydrogen atoms and counterions are omitted for clarity. Colour codes: Co, purple; C, grey; O, red; N, blue.

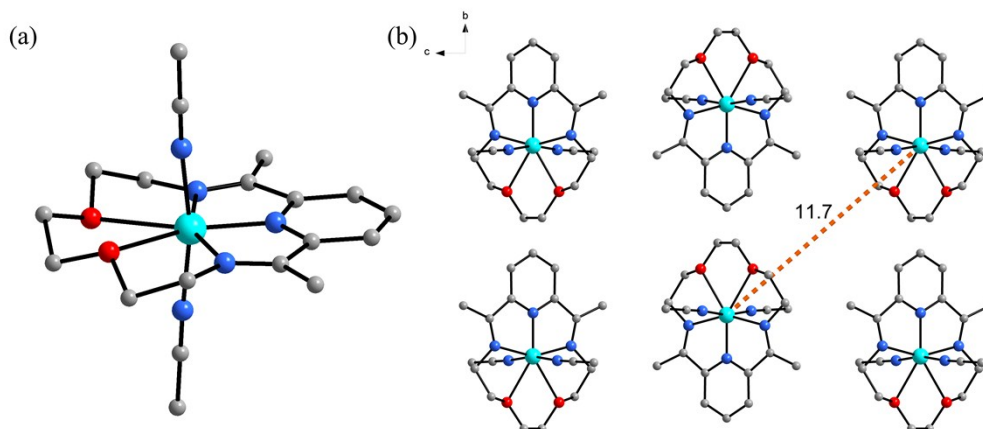

**Figure S3.** Molecular structure (a) and packing arrangement (b) of **3** along the crystallographic *a* axis; The dashed line shows the nearest intermolecular Ni...Ni separation (Å). Hydrogen atoms and counterions are omitted for clarity. Colour codes: Ni, green; C, grey; O, red; N, blue.

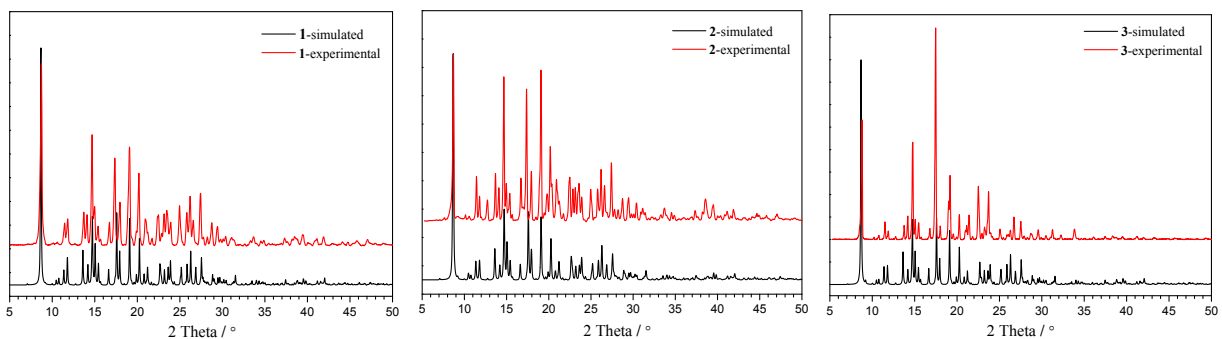

**Figure S4.** The powder X-ray diffractions for complexes 1-3. The black curve is calculated from the single crystal data.

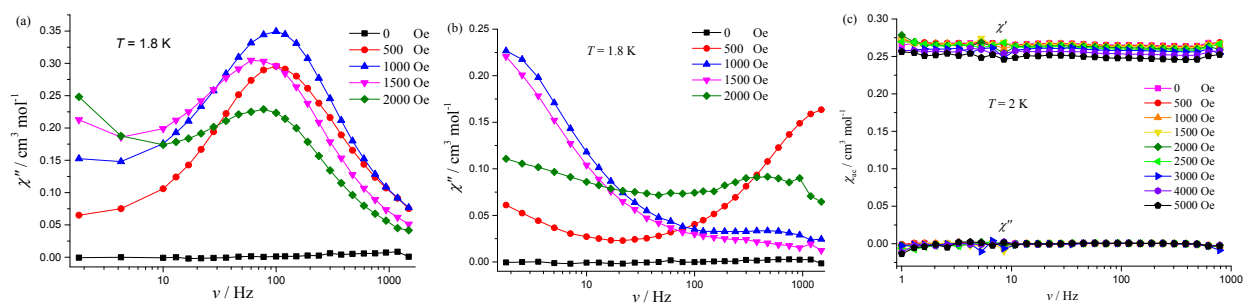

**Figure S5.** Frequency dependence of the ac susceptibility for 1(a), 2(b) and 3(c) under different dc fields. The lines are guides to the eyes.

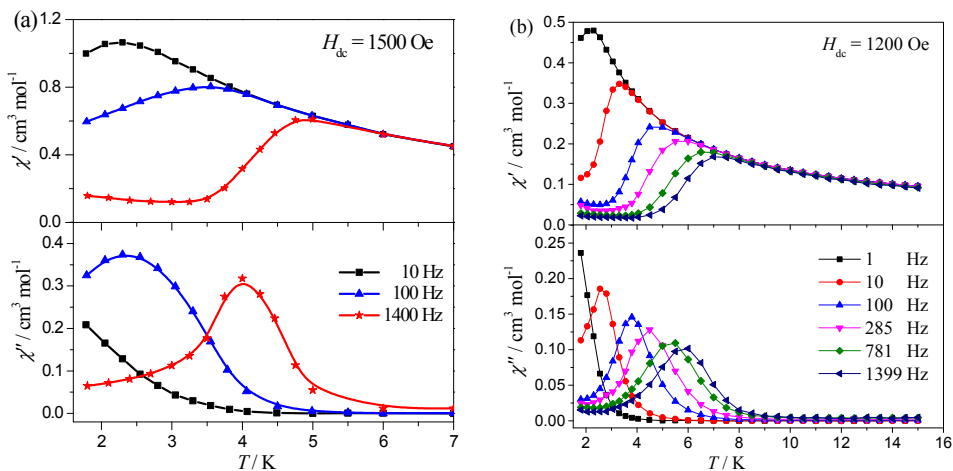

**Figure S6.** Temperature dependence of the in-phase ( $\chi'$ ) and out-of-phase ( $\chi''$ ) ac susceptibility for 1(a) and 2(b) at indicated dc field. The lines are guides to the eyes.

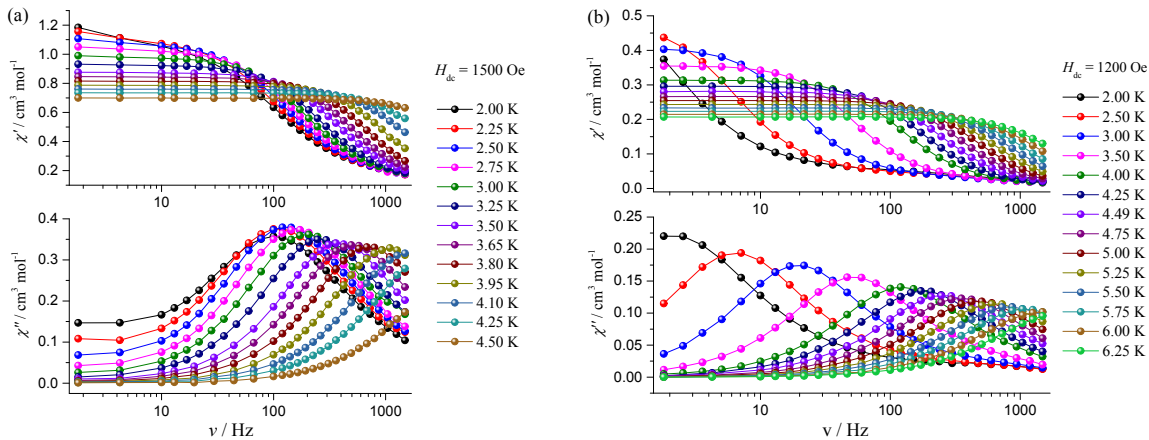

**Figure S7.** Frequency dependence of the in-phase  $\chi'$  (top) and out-of-phase  $\chi''$  (bottom) components of the ac susceptibility for **1(a)** and **2(b)** at indicated dc field. The lines are guides to the eyes.

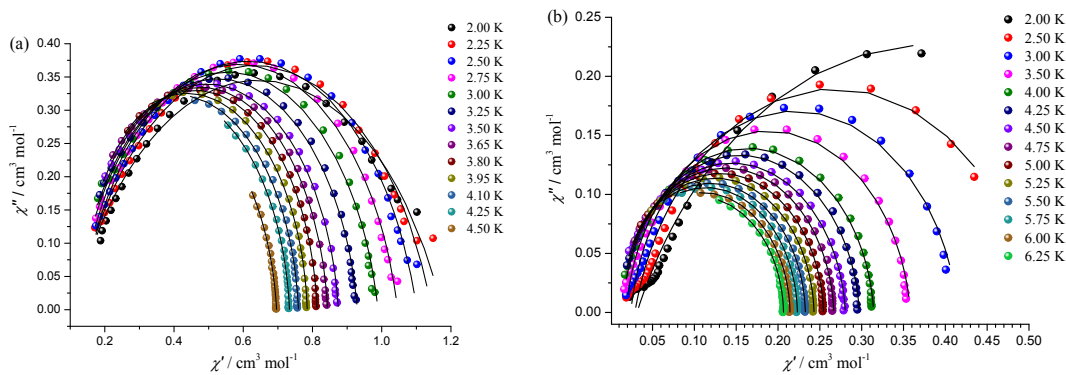

**Figure S8.** Cole-Cole plots for complexes **1(a)** and **2(b)**. The solid lines represent the fit to the data.

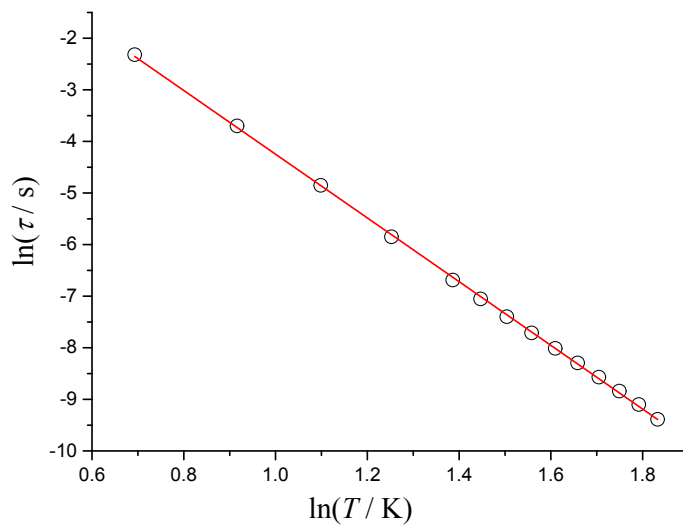

**Figure S9.** Power law analysis of complex **2** in the form  $\ln(\tau)$  vs  $\ln(T)$ . The solid line represents the best fits to the data.
